# Supplementary material
Source: publisher figshare collection journal article supplement (https://frontiersin.figshare.com/ndownloader/files/24678581)
Supplement: Supplementary file 1 [file 24678581]

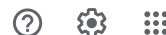

80

877

## Drafts

4

- 2016 BHNU
- Conversation Action Set...
- Journal
- News Feed
- Notes
- Quick Step Settings
- RSS Feeds
- Sync Issues

Join a meeting

+

*Find someone to chat with using the plus above.*

*Rooms are where the team magic happens. Find or create a room using the plus above.*

Inbox x

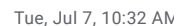

Jim, Good talking to you. I think your best contact to get some information about the Apalachicola National Forest's

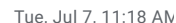

Thanks Mike and Hi Deborah I'm hoping to get an estimate for the funding allocated to support fire management on

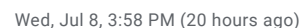

to Charles, me, John

Good afternoon Jim –

I will try to answer your questions, but given the nature of federal funding, there a lot of answers that start with “it depends.”

If you are speaking to funds allocated specifically for prescribed fire; the funding that goes to any one forest on any give depending on equipment replacement, costs of helicopter contracts, Transfer-of-Station for employees, and on.....

On average, the funding allocated to the Apalachicola is around 1 million/year. But again, that pays salaries, fleet costs contracts and flight time. Not sure if this gets at what you're looking for but if I can assist further, please let me know

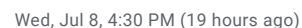

to Charles, Deborah, John

Hi Deborah

Thanks so much. I think this ballpark estimate will work fine and greatly appreciate your taking time to pass it along (and the details). I wanted something a bit more accurate than my wild guess about some of the variation in funding different
